# Supplementary material
Source: PubMed Central journal article supplement (PMC3413240)
Supplement: supp_D029546_JLR_D029546_Supplemental_Data_Corrected.pdf [file supp_D029546_JLR_D029546_Supplemental_Data_Corrected.pdf]

**Supplemental Fig. 1. Three commercially available BSAs contained contaminant(s) activating proinflammatory pathways.** BSA-1 (Sigma Catalog #: A8806, Lot 118K7405) (**A, B**), BSA-2 (Sigma Catalog #: A8806, Lot 040M7715V) (**C, D**) and BSA-3 (Sigma Catalog #: A8806, Lot 034K7605) (**E, F**) contained contaminant(s) that induce COX-2 expression in RAW 264.7 macrophages. COX-2 expression induced by these BSAs was not affected by the treatment of LPS sequester polymixin B in RAW 264.7 macrophages suggesting that the contaminant-induced COX-2 expression is mediated through TLR4 independent pathways (**A, C, E**). COX-2 expression induced by these BSAs was abolished in MyD88<sup>-/-</sup> macrophages suggesting that the contaminants in these BSAs can activate MyD88-dependent TLR or IL-1 receptor-mediated signaling pathways (**B, D, F**). RAW 264.7 (**A, C, E**) or MyD88<sup>-/-</sup> (**B, D, F**) macrophages were serum starved in 0.25% FBS/DMEM medium for 6 hr and then treated in the same serum poor medium with indicated reagents for 18 hr. For polymixin B experiments, RAW 264.7 cells were pretreated with 7.5 ug/ml polymixin B for 1 hr and then coincubated with the indicated reagents for 18 hr. The protein lysates were probed for COX-2 and  $\beta$ -actin by immunoblotting. LPS, 0.2 ng/ml for RAW 264.7 macrophages (**A, C, E**) and 5 ng/ml for MyD88<sup>-/-</sup> macrophages (**B, D, F**). 50 ng/ml PamCSK4 (Pam), 200  $\mu$ M MDP, 5  $\mu$ g/ml poly I:C for MyD88<sup>-/-</sup> macrophages (**B, D, F**).

**Supplemental Fig. 2. Responsiveness of cells to C12:0 or LPS varied significantly with the source of FBS used in the culture medium.** RAW 264.7 macrophage cells were serum starved in 0.25% FBS/DMEM for 6 hr and then treated with vehicle (Veh), 0.2 ng/ml LPS or 100  $\mu$ M lauric acid (C12:0, sodium salt) for 16 hr using FBS from five different sources: Atlanta 1 (premium select FBS, Catalog #: S11595, Lot #: K0109) and Atlanta 2 (Optima FBS, Catalog #:

S12495, Lot #: L0019) from Atlanta Biologicals, Hyclone (Catalog #: SH30071, Lot #: ATD31956) from HyClone, Gibco (Catalog #: 10082, Lot #: 544122) from Invitrogen, and Atlas (Catalog #: F-0500-A, Lot #: 80814) from Atlas Biologicals. The protein lysates were probed for COX-2 and  $\beta$ -actin by immunoblotting.

**Supplemental Fig. 3. C16:0-BSA induced JNK phosphorylation and IL-8 expression in THP-1 cells. The C16:0-BSA-induced IL-8 expression was inhibited by DHA but was not affected by polymixin B treatment.** **A.** THP-1 cells were serum starved in 0.25% FBS/RPMI-1640 medium for 12 hr and then treated with 500  $\mu$ M C16:0-BSA or equivalent concentration (50  $\mu$ M) of BSA in the same low serum medium for 0-180 min. The resulting cell lysates were probed for phospho-JNK (JNK-p), JNK, and  $\beta$ -actin by immunoblotting. **B, C.** THP-1 cells were serum starved as in **A** and then pretreated with or without 1  $\mu$ g/ml polymixin B (PM) for 1 hr followed by treatment with 100 ng/ml LPS, 100-500  $\mu$ M C16:0-BSA or 50  $\mu$ M BSA in the same low serum medium for 24 hr (**B**) or pretreated with or without indicated concentrations of DHA for 1 hr and then coincubated with 500  $\mu$ M C16:0-BSA for 24 hr (**C**). The resulting culture medium supernatants were assayed for IL-8 by ELISA. \* $p < 0.05$  and \*\*  $p < 0.01$ : significantly different from 50  $\mu$ M BSA control (**B**), or from no DHA control (**C**).

**Supplemental Fig. 4. LPS endotoxin titration.** The endotoxin levels of LPS (10-200 pg/ml) was measured by LAL assays using the recombinant factor C endotoxin detection system as described in the Methods. The endotoxin level (EU/ml) is plotted against the LPS concentrations (pg/ml). The endotoxin levels of sodium salt C16:0 (75-1200  $\mu$ M) and free fatty acid C16:0 (250-1000  $\mu$ M) are included. The correlation coefficient is indicated for the LPS titration curve.

**Supplemental Fig. 5. LPS at 20 pg/ml or lower activated much lower levels of COX-2 and TNF- $\alpha$  expression in RAW 264.7 cells (A, B) or IL-8 expression in THP-1 cells (C) compared to sodium salt C12:0 and C16:0-BSA (A, B) or sodium salt C16:0 (C).** A. RAW 264.7 cells were serum starved in 0.25% FBS/DMEM for 6 hr then treated with 1-200 pg/ml LPS, 150  $\mu$ M C12:0, 500  $\mu$ M C16:0-BSA or 50  $\mu$ M BSA for 16 hr. The resulting cell lysates were probed for COX-2 and  $\beta$ -actin by immunoblotting. B. RAW 264.7 cells were serum starved for 6 hr then treated with 1-200 pg/ml LPS, 150  $\mu$ M C12:0, 500  $\mu$ M C16:0-BSA or 50  $\mu$ M BSA for 16 hr. The expression levels of TNF- $\alpha$  were measured from the resulting medium supernatants by ELISA. C. THP-1 cells were serum starved in 0.25% FBS/RPMI for 12 hr then treated with vehicle, 150  $\mu$ M sodium salt C16:0, or 0.01-10 ng/ml LPS for 24 hr. The resulting medium supernatants were assayed for IL-8 levels by ELISA. \* $p < 0.05$  and \*\*  $p < 0.01$ : significantly different between vehicle control and LPS, C12:0 or C16:0-BSA (B), or between vehicle control and LPS or sodium salt C16:0 (C).

**Supplemental Fig. 6. DHA suppressed LPS-induced COX-2 and TNF- $\alpha$  expression.** RAW 264.7 cells were serum starved in 0.25% FBS/DMEM for 6 hr. The cells were then pretreated with indicated concentrations of DHA for 1 hr followed by coincubation with 0.2 ng/ml LPS for 16 hr. The protein lysates were probed for COX-2 and  $\beta$ -actin by immunoblotting (A) and the culture medium supernatants assayed by ELISA (B). \* $p < 0.05$  and \*\*  $p < 0.01$ : significantly different from no DHA control.

**Supplemental Fig. 7. TLR4 signaling inhibitor TAK-242 suppressed LPS- and C12:0-induced activation of COX-2 and TNF- $\alpha$  expression.** RAW 264.7 cells were serum starved in 0.25% FBS/DMEM for 6 hr. The cells were then pretreated with indicated concentrations of TAK-242 for 1 hr followed by coincubation with 0.2 ng/ml LPS, 2 ng/ml PamCSK4, or 100  $\mu$ M C12:0 for 16 hr. The protein lysates were probed for COX-2 and  $\beta$ -actin by immunoblotting (**A**) and the culture medium supernatants assayed for TNF- $\alpha$  by ELISA (**B**). \* $p < 0.05$  and \*\*  $p < 0.01$ : significantly different from no TAK-242 control.

Supplemental Fig. 1A, B

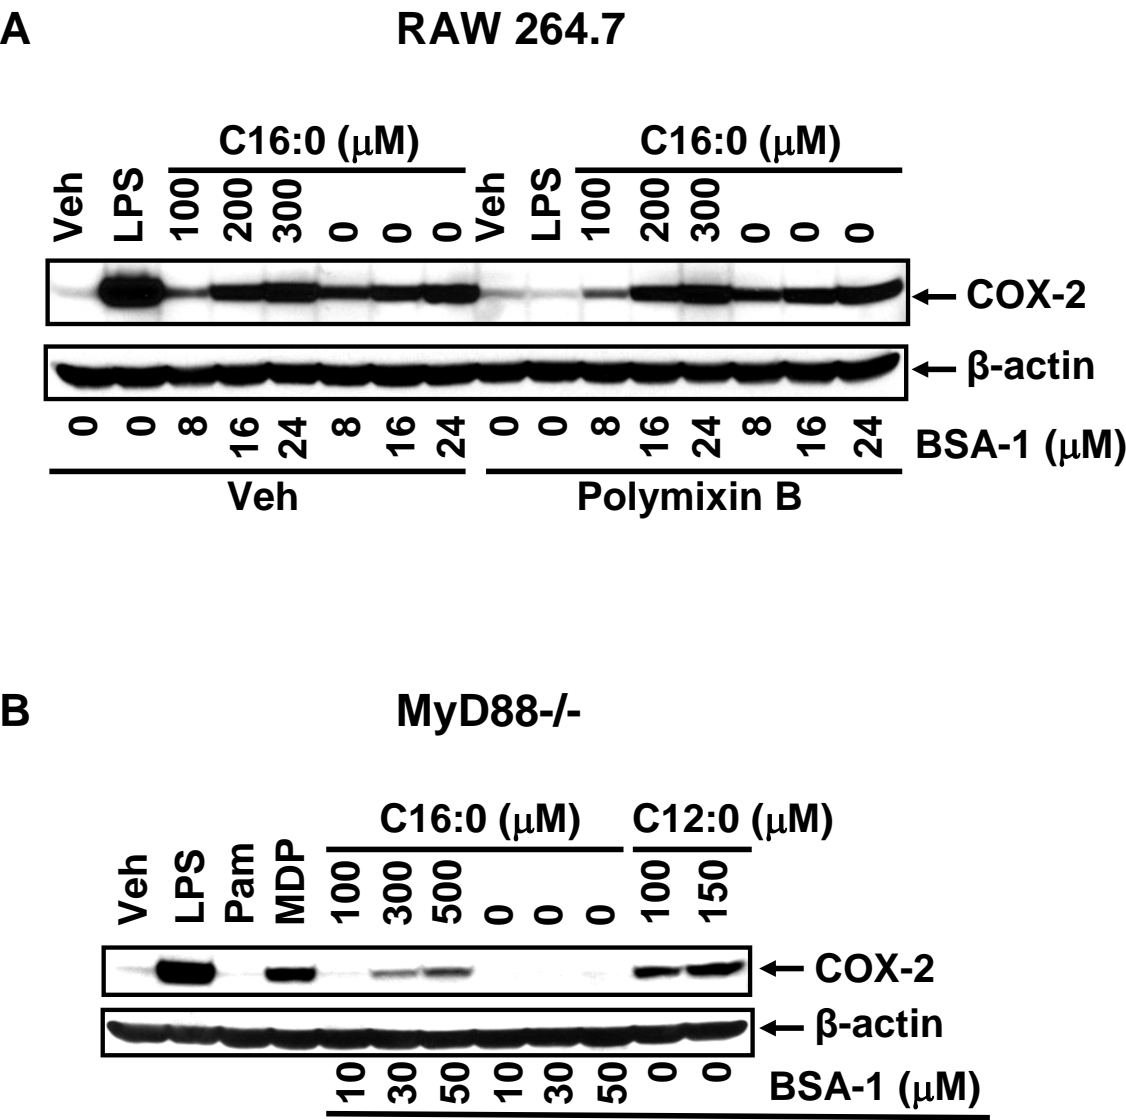

Supplemental Fig. 1C, D

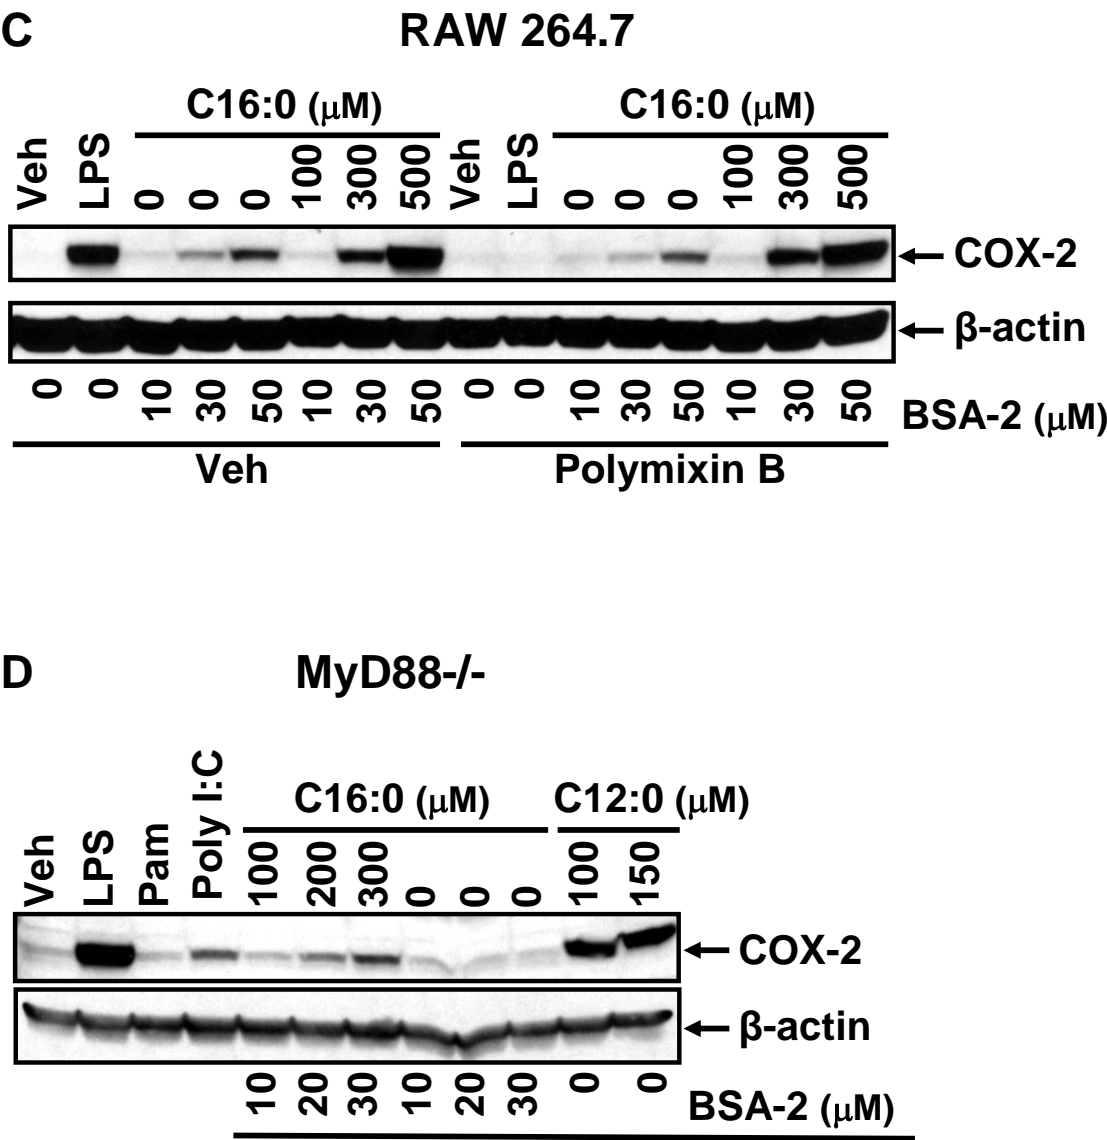

Supplemental Fig. 1E, F

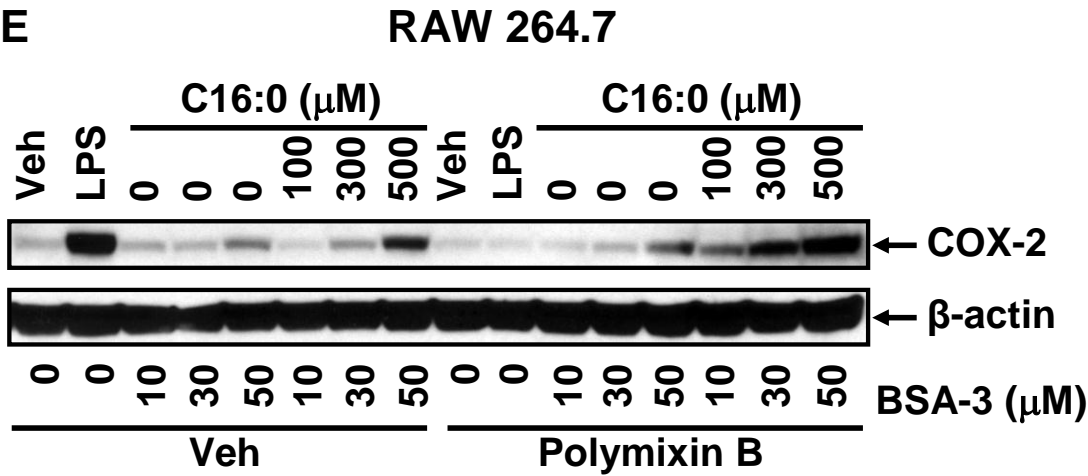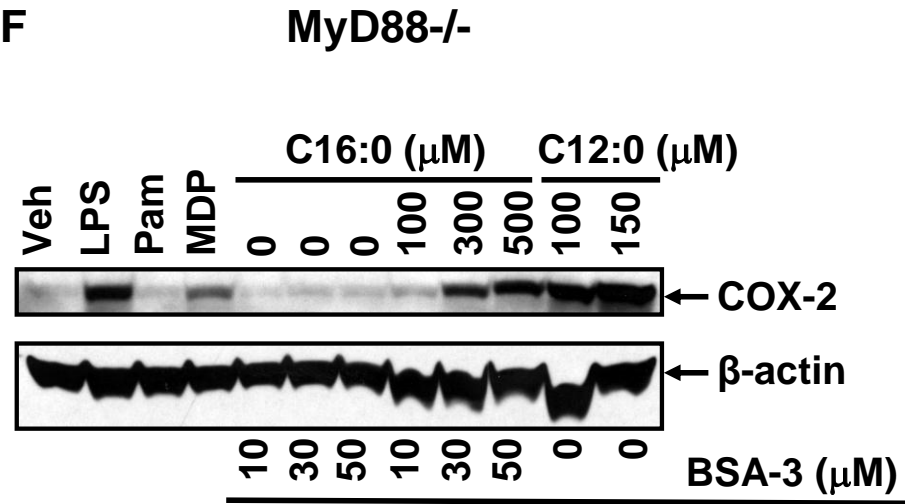

**Supplemental Fig. 2**

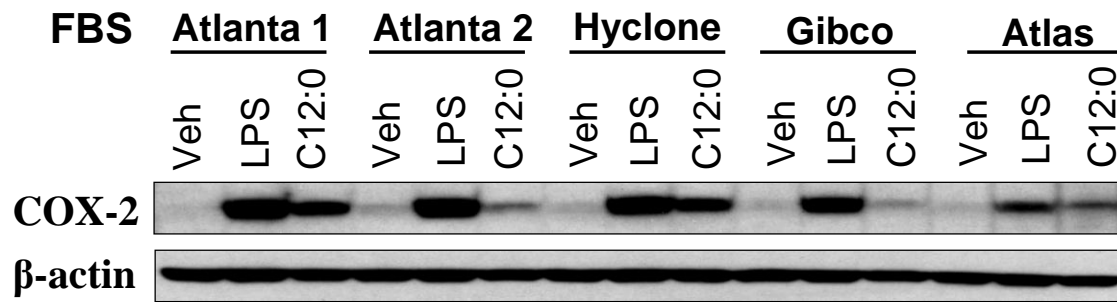

Supplemental Fig. 3A-C

A

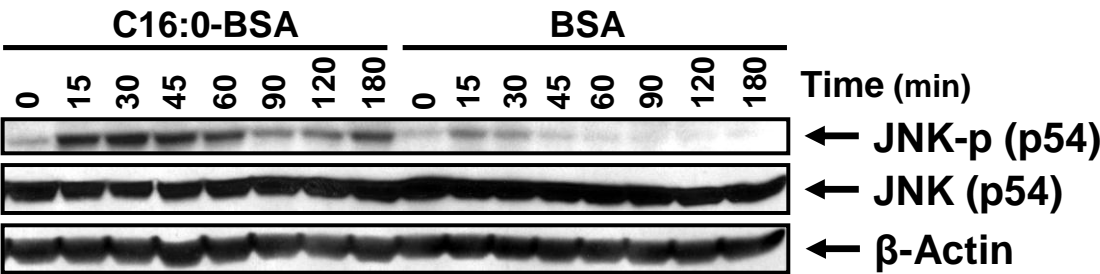

B

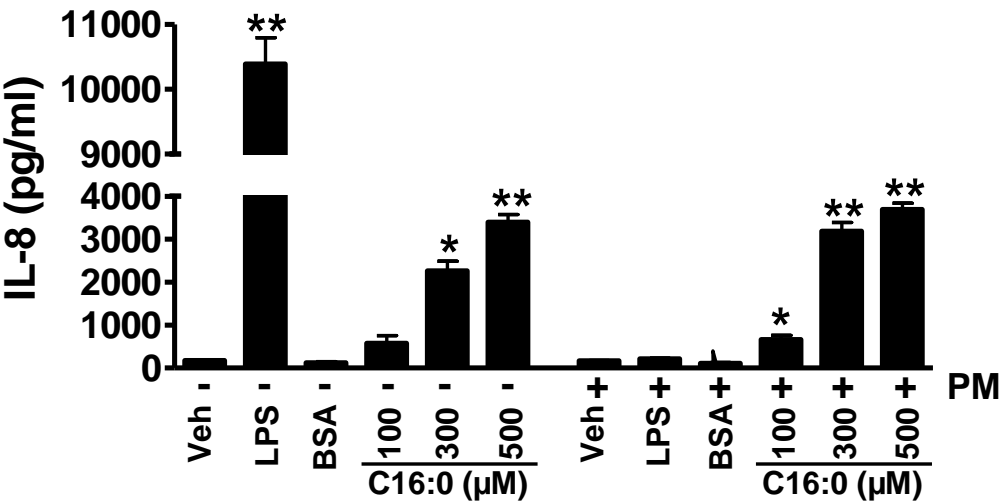

C

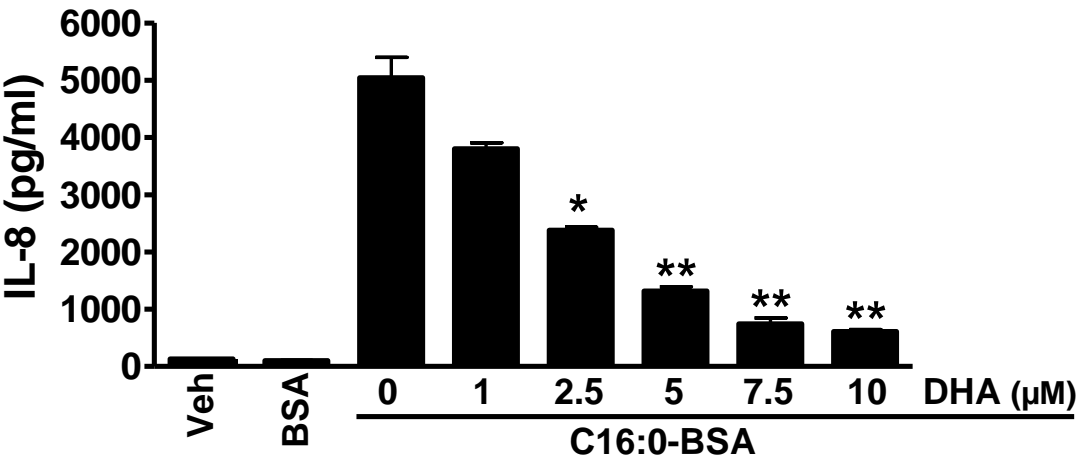

Supplemental Fig. 4

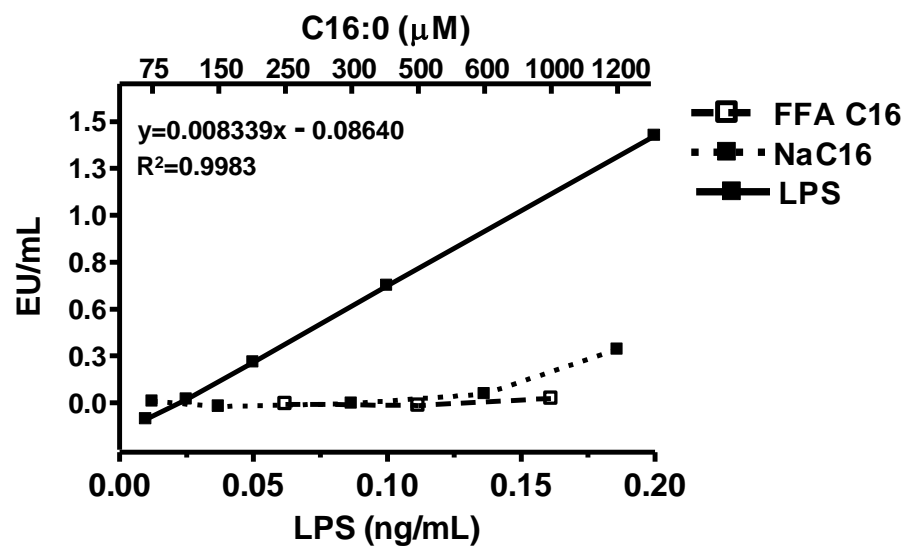

Supplemental Fig. 5A-C

A

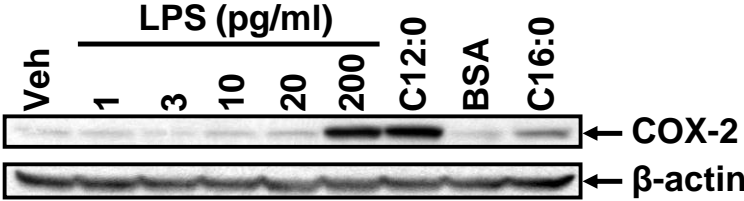

B

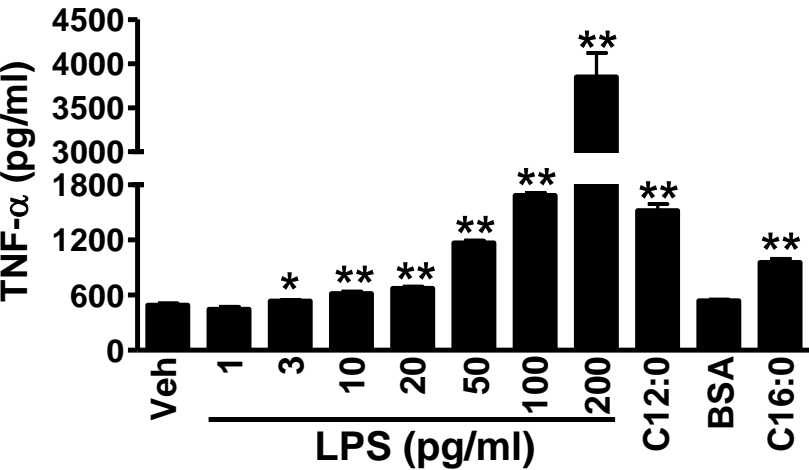

C

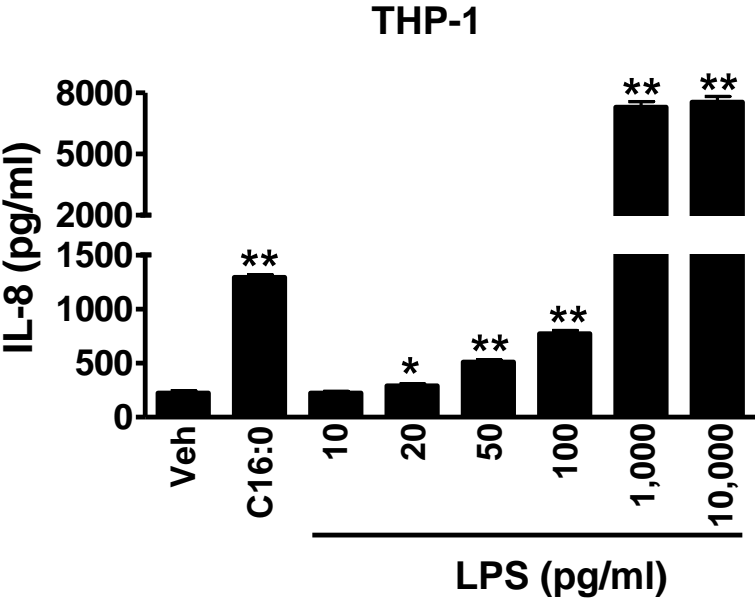

Supplemental Fig. 6A, B

A

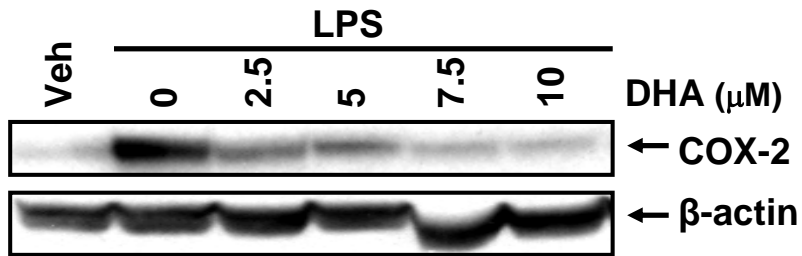

B

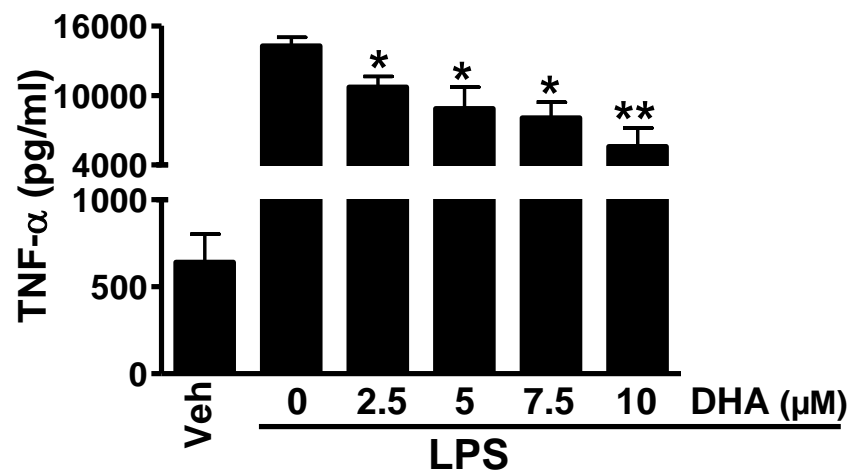

Supplemental Fig. 7A, B

A

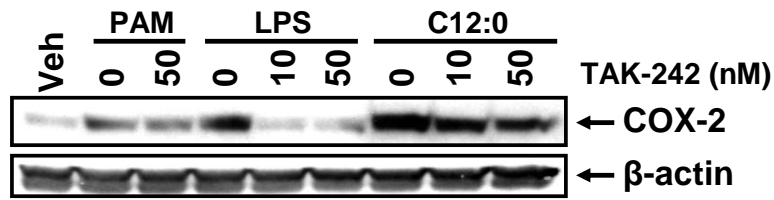

B

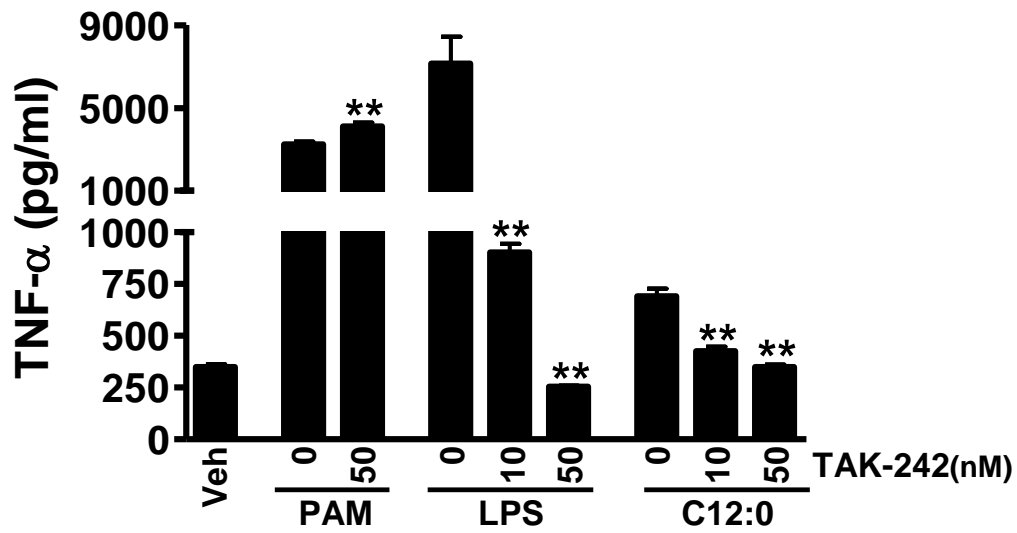

**Supplemental Table 1. LAL assays.** The assays for FBS were done using the ToxinSensor chromogenic LAL endotoxin assay kit (Cat #: L00350, GenScript, Piscataway, NJ) following the supplier's procedures. The assays for all other reagents were done using the recombinant factor C endotoxin detection system (Cat #: 50-658U, Lonza, Walkersville, MD) following the supplier's procedures.

| Reagent                                     | Endotoxin (EU/ml) | Additional Information                                                                   |
|---------------------------------------------|-------------------|------------------------------------------------------------------------------------------|
| BSA                                         |                   |                                                                                          |
| Sigma BSA 1 50 $\mu$ M                      | 2.196             | Sigma Cat #: A8806 Lot 118K7405                                                          |
| Sigma BSA 2 50 $\mu$ M                      | 1.124             | Sigma Cat #: A8806 Lot 040M7715V                                                         |
| Sigma BSA 3 50 $\mu$ M                      | 1.057             | Sigma Cat #: A8806 Lot 034K7605                                                          |
| Fitzgerald BSA 50 $\mu$ M                   | UD                | Fitzgerald Cat #: 30-AB79 Lot A10072001                                                  |
|                                             |                   |                                                                                          |
| Fatty Acid                                  |                   |                                                                                          |
| Na-C12:0 300 $\mu$ M                        | UD                | Nu-Chek Cat #: S-1105 Lot S24-N                                                          |
| Na-C16:0 150 $\mu$ M                        | 0.064             | Sigma Cat #: P9767 Lot 079K1444                                                          |
| FFA C16:0 500 $\mu$ M                       | 0.046             | Sigma Cat #: P5585 Lot 020M15811                                                         |
| DHA 20 $\mu$ M                              | UD                | Sigma Cat #: D8768 Lot 077K5215                                                          |
|                                             |                   |                                                                                          |
| Plamid DNA                                  |                   |                                                                                          |
| pCDNA                                       | UD                | 1 $\mu$ g/ml                                                                             |
| pDisplay, NF $\kappa$ B-Luc, $\beta$ -gal   | UD                | 1 ug/ml (0.5 $\mu$ g/ml pDisplay, 0.25 ug/ml NF $\kappa$ B-Luc, 0.25 ug/ml $\beta$ -gal) |
| TLR2, TLR1, NF $\kappa$ B-Luc, $\beta$ -gal | UD                | 1 $\mu$ g/ml (0.25 $\mu$ g/ml each)                                                      |
| TLR2, TLR6, NF $\kappa$ B-Luc, $\beta$ -gal | UD                | 1 $\mu$ g/ml (0.25 $\mu$ g/ml each)                                                      |

|                              |    |                                |
|------------------------------|----|--------------------------------|
| TLR4, MD2, NFκB-Luc, β-gal   | UD | 1 μg/ml (0.25 μg/ml each)      |
|                              |    |                                |
| FBS                          |    |                                |
| FBS (Atlanta Premium Select) | UD | Cat #: S11550 Lot K0109        |
| FBS (Atlanta Optima)         | UD | Cat #: S12495 Lot L0019        |
| FBS (Hyclone)                | UD | Cat #: SH30071 Lot ATD31956    |
| FBS (Atlas)                  | UD | Cat #: F-0500-A Lot 80814      |
| FBS (Gibco)                  | UD | Cat #: 10082 Lot 544122        |
|                              |    |                                |
| Medium                       |    |                                |
| DMEM medium                  | UD | Gibco Cat #: 31053 Lot 979502  |
| RPMI Medium                  | UD | Gibco Cat #: 11835 Lot 1007553 |

FFA, free fatty acid; NFκB-Luc, NFκB-Luciferase; β-gal, β-galactosidase; UD, undetectable.
